# Supplementary material for: Negative Correlation between Lipid Content and Antibiotic Activity in Streptomyces: General Rule and Exceptions
Source: MDPI journal article supplement (doi:10.3390/antibiotics9060280), 2020-05-26

**Figure S1** : LC/Corona-CAD results of total lipid content in *Streptomyces antibioticus* DSM 41481 and *Streptomyces* sp. DSM 40868 grown for 72h on solid R2YE glucose medium limited in phosphate. TAG stands for TriAcylGlycerol, DAG for DiAcylGlycerol, FA for Fatty Acids, PE for PhosphatidylEthanolamine, PA for Phosphatidic Acid, PI for Phosphatidyl Inositol, PIMs for PhosphatidylInositol Mannosides and CL for CardioLipid.

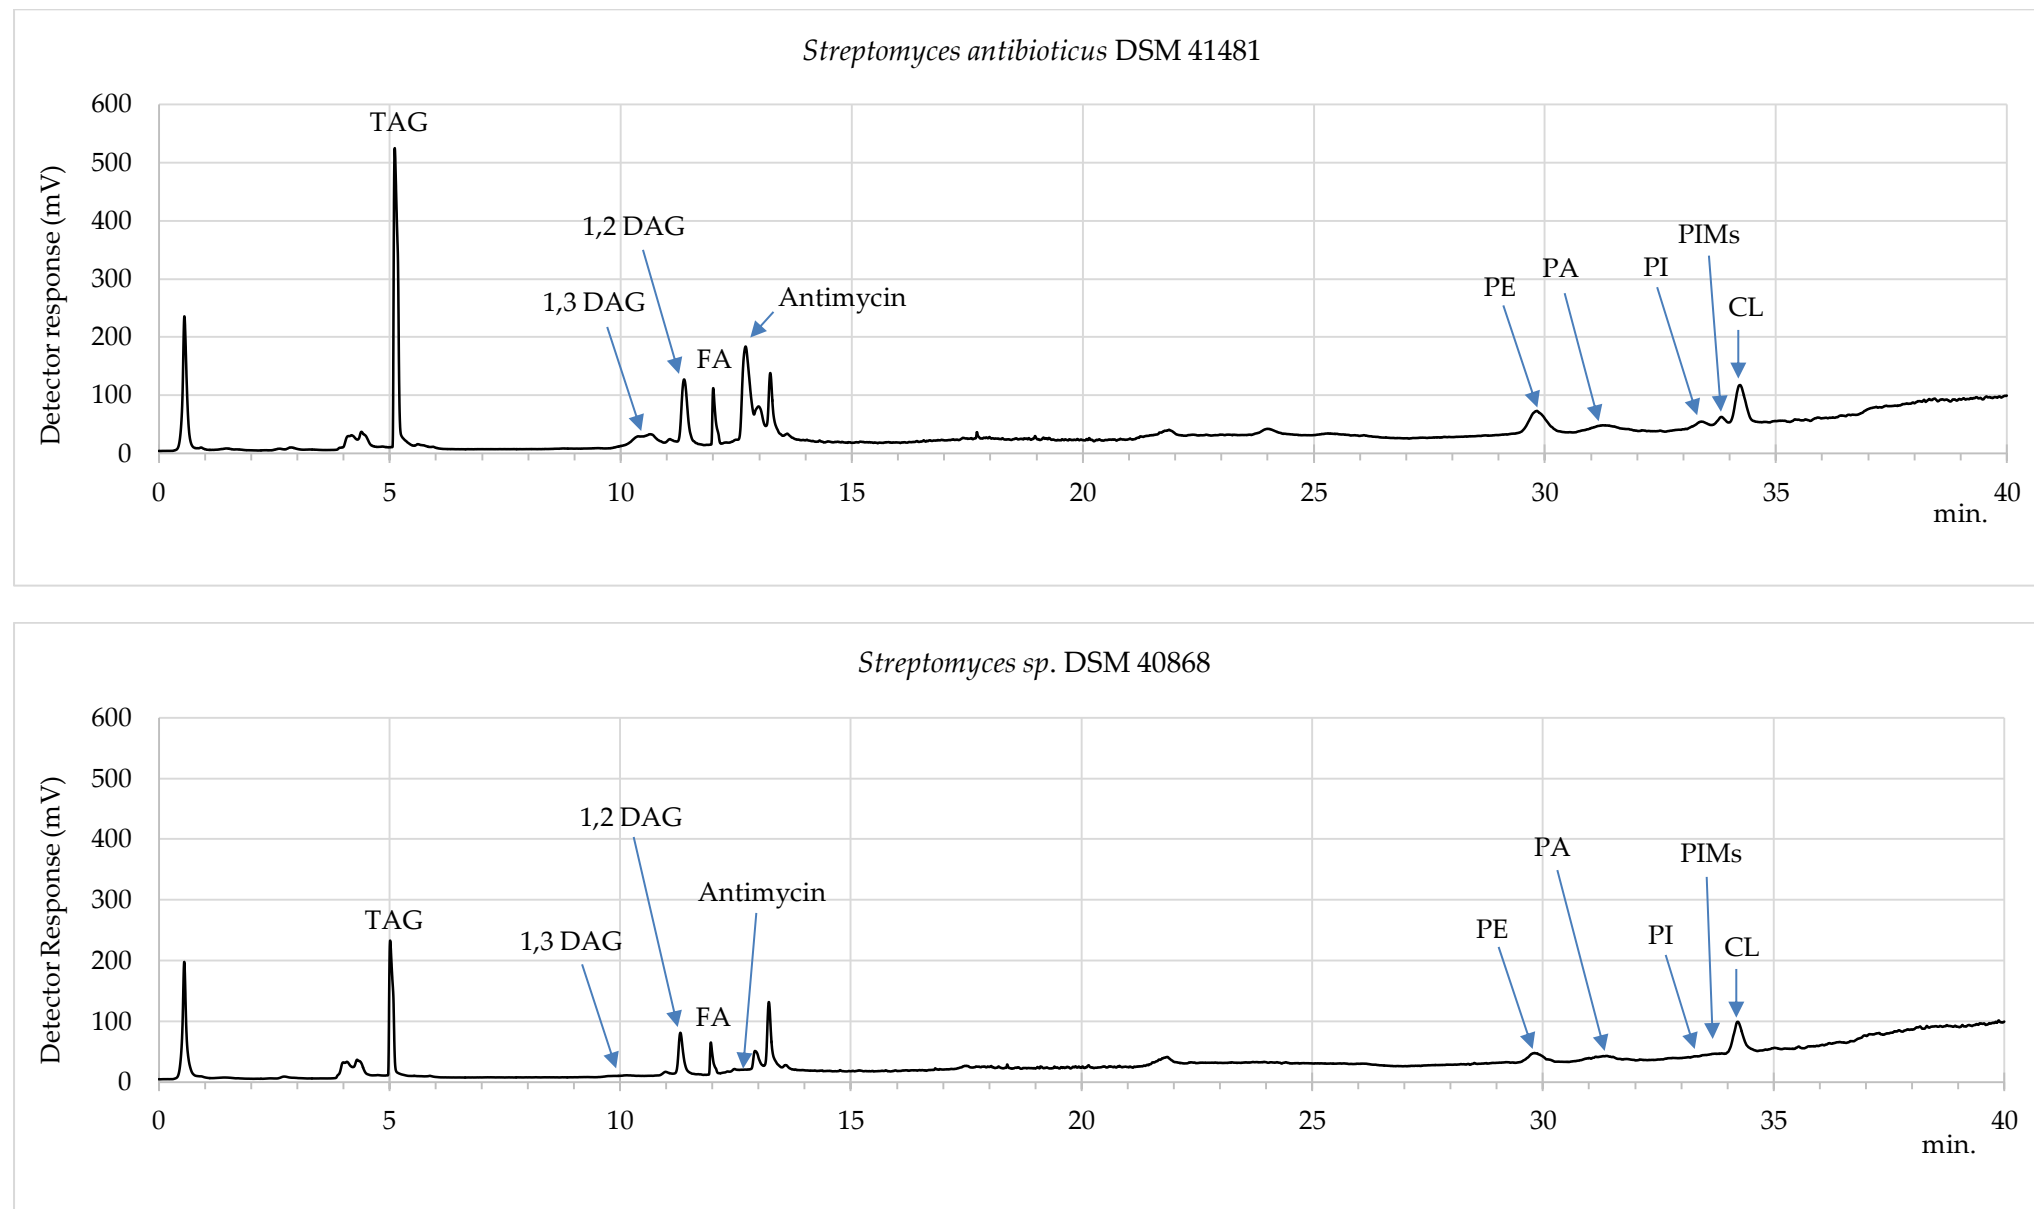

**Figure S2 :** Anti-Smash analysis of the genome of *Streptomyces antibioticus* DSM 41481 (8,473,575 bp).

| Region    | Type                                   | From      | To        | Most similar known cluster     |                  | Similarity |
|-----------|----------------------------------------|-----------|-----------|--------------------------------|------------------|------------|
| Region 1  | bacteriocin                            | 216,990   | 226,748   |                                |                  |            |
| Region 2  | lanthipeptide  , terpene               | 327,516   | 361,829   | Isorenieratene                 | terpene          | 100%       |
| Region 3  | terpene  , melanin                     | 686,666   | 707,133   | Melanin                        | other            | 71%        |
| Region 4  | NRPS  , T1PKS                          | 731,747   | 800,687   | Foxicins A–D                   | nrps-t1pks       | 12%        |
| Region 5  | other  , CDPS  , NRPS                  | 1,217,807 | 1,292,777 | Diisonitrile antibiotic SF2768 | NRPS             | 50%        |
| Region 6  | terpene  , NRPS-like  , T1PKS  , T2PKS | 1,320,700 | 1,451,170 | Spore pigment                  | t2pks            | 83%        |
| Region 7  | NRPS-like                              | 1,943,835 | 1,985,314 | Octacosamicin                  | nrps-t1pks       | 12%        |
| Region 8  | ectoine                                | 2,173,921 | 2,184,325 | Ectoine                        | other            | 100%       |
| Region 9  | melanin                                | 3,218,444 | 3,228,956 | Istamycin                      | saccharide       | 5%         |
| Region 10 | siderophore                            | 3,311,605 | 3,322,761 | Desferrioxamine                | other            | 83%        |
| Region 11 | T2PKS                                  | 3,825,239 | 3,897,733 | Fredericamycin                 | t2pks            | 81%        |
| Region 12 | furan  , butyrolactone                 | 4,452,480 | 4,476,188 | Methylenomycin                 | other            | 14%        |
| Region 13 | terpene                                | 5,656,885 | 5,677,058 | Albaflavenone                  | terpene          | 100%       |
| Region 14 | NRPS-like                              | 5,732,586 | 5,775,707 | Chloramphenicol                | NRPS             | 17%        |
| Region 15 | siderophore                            | 6,330,896 | 6,342,710 |                                |                  |            |
| Region 16 | bacteriocin                            | 6,531,965 | 6,542,189 |                                |                  |            |
| Region 17 | terpene  , butyrolactone               | 6,571,015 | 6,592,442 | Gamma-butyrolactone            | other            | 100%       |
| Region 18 | siderophore                            | 6,730,014 | 6,743,257 | Grincamycin                    | t2pks-saccharide | 5%         |
| Region 19 | NRPS  , T1PKS                          | 6,832,866 | 6,889,853 | Antimycin                      | nrps-t1pks       | 100%       |
| Region 20 | indole                                 | 6,981,746 | 7,002,897 | Terfestatin                    | other            | 23%        |
| Region 21 | terpene                                | 7,194,476 | 7,221,197 | Hopene                         | terpene          | 92%        |
| Region 22 | T1PKS  , hglE-KS                       | 7,247,598 | 7,298,972 | Divergolide                    | t1pks            | 13%        |
| Region 23 | bacteriocin                            | 7,520,677 | 7,530,892 | Informatipeptin                | lanthipeptide    | 42%        |
| Region 24 | NRPS                                   | 7,678,965 | 7,736,702 | Scabichelin                    | NRPS             | 80%        |
| Region 25 | NRPS-like                              | 7,929,006 | 7,970,314 |                                |                  |            |
| Region 26 | other  , NRPS                          | 8,157,649 | 8,227,375 | Actinomycin                    | NRPS             | 89%        |

**Figure S3 :** Anti-smash analysis of the genome of *Streptomyces* sp. DSM 40868 (registered in gene bank as *Streptomyces antibioticus* DSM 40868 or ATCC 11891) ( 9,195,693 bp).

| Region    | Type                               | From      | To        | Most similar known cluster    |                  | Similarity |
|-----------|------------------------------------|-----------|-----------|-------------------------------|------------------|------------|
| Region 1  | NRPS                               | 54,676    | 133,284   | Azicemicin                    | t2pks            | 13%        |
| Region 2  | lanthipeptide                      | 142,326   | 165,105   |                               |                  |            |
| Region 3  | NRPS                               | 280,799   | 326,337   | Paenibactin                   | NRPS             | 83%        |
| Region 4  | betalactone, NRPS-like, nucleoside | 370,187   | 417,072   | Nikkomycin                    | other            | 100%       |
| Region 5  | terpene                            | 417,600   | 440,735   | Carotenoid                    | terpene          | 63%        |
| Region 6  | lassopeptide, NRPS                 | 546,976   | 606,763   | Achromosin                    | other            | 100%       |
| Region 7  | lassopeptide                       | 623,914   | 646,589   | SSV-2083                      | lanthipeptide    | 37%        |
| Region 8  | butyrolactone                      | 647,972   | 657,972   |                               |                  |            |
| Region 9  | lanthipeptide, phenazine           | 684,123   | 720,741   | Primycin                      | t1pks            | 8%         |
| Region 10 | T1PKS                              | 950,214   | 1,062,317 | Sceliphrolactam               | t1pks            | 92%        |
| Region 11 | melanin                            | 1,207,953 | 1,217,563 | Melanin                       | other            | 57%        |
| Region 12 | T3PKS                              | 1,645,922 | 1,685,386 | Herboxidiene                  | t1pks+t3pks      | 6%         |
| Region 13 | terpene                            | 1,721,550 | 1,740,878 | 4-Z-annimycin                 | t1pks            | 22%        |
| Region 14 | ectoine                            | 2,346,568 | 2,355,857 | Ectoine                       | other            | 100%       |
| Region 15 | terpene                            | 2,673,584 | 2,693,584 | Calcium-dependent antibiotic  | NRPS             | 5%         |
| Region 16 | T2PKS                              | 2,711,900 | 2,783,355 | Spore pigment                 | t2pks            | 83%        |
| Region 17 | ectoine                            | 2,801,259 | 2,810,728 | Showdomycin                   | other            | 52%        |
| Region 18 | melanin                            | 3,354,806 | 3,365,330 | Istamycin                     | saccharide       | 4%         |
| Region 19 | siderophore                        | 3,472,780 | 3,483,385 | Desferrioxamine B             | other            | 83%        |
| Region 20 | terpene                            | 3,931,030 | 3,950,571 |                               |                  |            |
| Region 21 | T1PKS, NRPS                        | 4,694,531 | 4,750,189 | Thuggacin                     | nrps-t1pks       | 12%        |
| Region 22 | T2PKS                              | 4,803,448 | 4,873,883 | Oviedomycin                   | t2pks            | 95%        |
| Region 23 | NRPS                               | 5,093,311 | 5,144,937 | Ikarugamycin                  | nrps-t1pks       | 12%        |
| Region 24 | NRPS                               | 5,593,128 | 5,666,806 | Marinopyrrole                 | nrps-t1pks       | 16%        |
| Region 25 | terpene                            | 5,802,574 | 5,823,000 | Albaflovenone                 | terpene          | 100%       |
| Region 26 | bacteriocin                        | 5,999,330 | 6,007,931 |                               |                  |            |
| Region 27 | siderophore                        | 6,427,302 | 6,439,209 | Fiellomycin                   | NRPS             | 3%         |
| Region 28 | NRPS                               | 6,592,191 | 6,634,621 | Meilingmycin                  | t1pks            | 6%         |
| Region 29 | bacteriocin                        | 6,694,119 | 6,703,498 | Streptonigrin                 | other            | 5%         |
| Region 30 | butyrolactone                      | 6,710,173 | 6,720,639 | Rabelomycin                   | t2pks-saccharide | 6%         |
| Region 31 | terpene                            | 6,730,307 | 6,749,776 | Geosmin                       | terpene          | 100%       |
| Region 32 | siderophore                        | 6,889,179 | 6,902,589 |                               |                  |            |
| Region 33 | butyrolactone                      | 6,928,260 | 6,936,962 | Griseoviridin / viridogrisein | nrps-transatpks  | 5%         |
| Region 34 | T1PKS                              | 6,938,971 | 7,013,546 | Erythromycin                  | t1pks            | 38%        |
| Region 35 | butyrolactone, arylpolyene         | 7,066,089 | 7,108,766 | Rabelomycin                   | t2pks-saccharide | 6%         |
| Region 36 | terpene                            | 7,348,015 | 7,372,444 | Hopene                        | terpene          | 92%        |
| Region 37 | T2PKS, NRPS                        | 7,389,180 | 7,503,550 | Erdacin                       | t2pks            | 44%        |
| Region 38 | bacteriocin                        | 7,567,823 | 7,578,178 |                               |                  |            |
| Region 39 | bacteriocin, NRPS, terpene         | 7,892,210 | 7,990,946 | Informateptin                 | lanthipeptide    | 42%        |
| Region 40 | NRPS-like                          | 8,207,244 | 8,249,798 | Livipeptin                    | NRPS             | 100%       |
| Region 41 | NRPS                               | 8,357,875 | 8,400,853 | Disorazole                    | nrps-transatpks  | 14%        |
| Region 42 | T3PKS                              | 8,451,398 | 8,492,519 | Balhimycin                    | NRPS             | 5%         |
| Region 43 | nucleoside                         | 8,524,885 | 8,545,799 |                               |                  |            |
| Region 44 | ectoine                            | 8,697,094 | 8,707,507 | Ectoine                       | other            | 75%        |
| Region 45 | lanthipeptide, NRPS                | 8,940,409 | 9,046,443 | Paulomycin                    | other            | 7%         |
| Region 46 | fused                              | 9,126,473 | 9,150,066 |                               |                  |            |

**Figure S4:** Chromosomal position of the biosynthetic gene clusters predicted by antiSMASH along the chromosome of *Streptomyces* sp. DSM 40868 and *Streptomyces antibioticus* DSM 41481. Metabolites synthesized by similar biosynthetic pathways are signaled by a vertical bar and named.

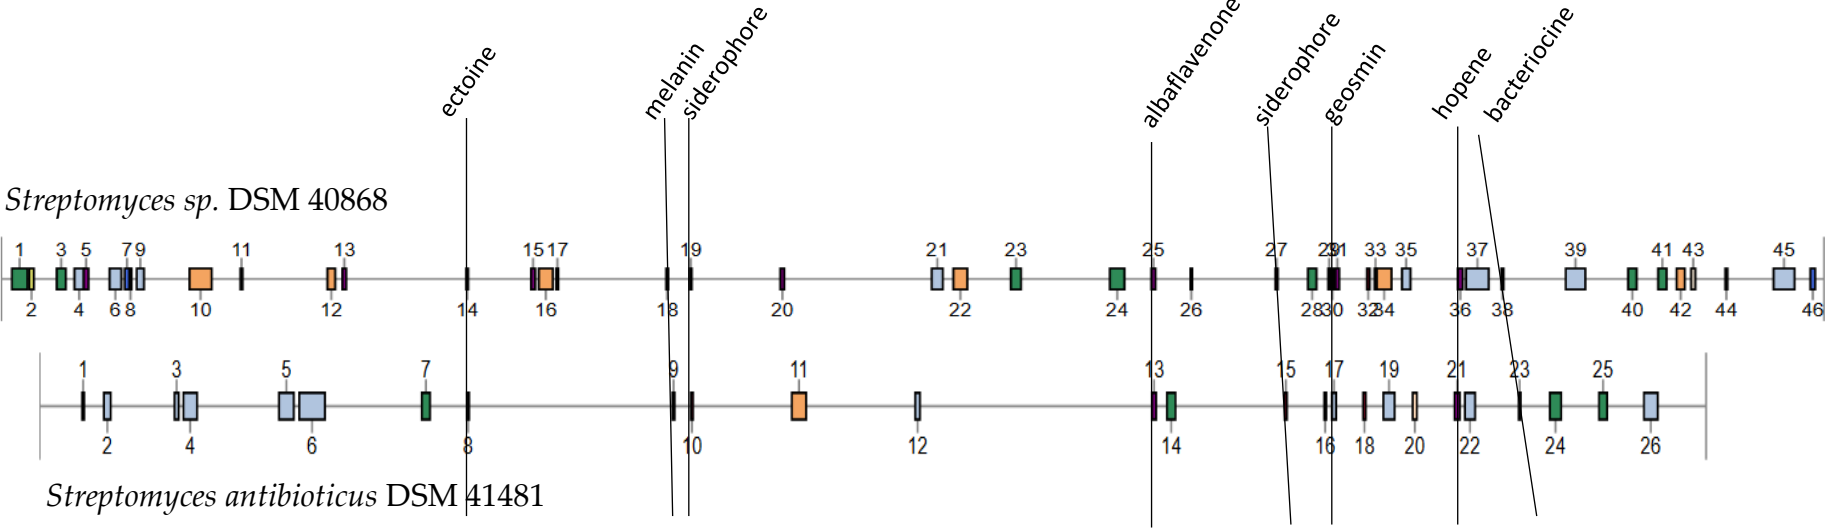

**Figure S5 :** Comparative analysis of glycolysis/gluconeogenesis pathway of DSM 40868 and DSM 41481.

*Streptomyces* sp. DSM 40868

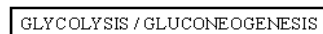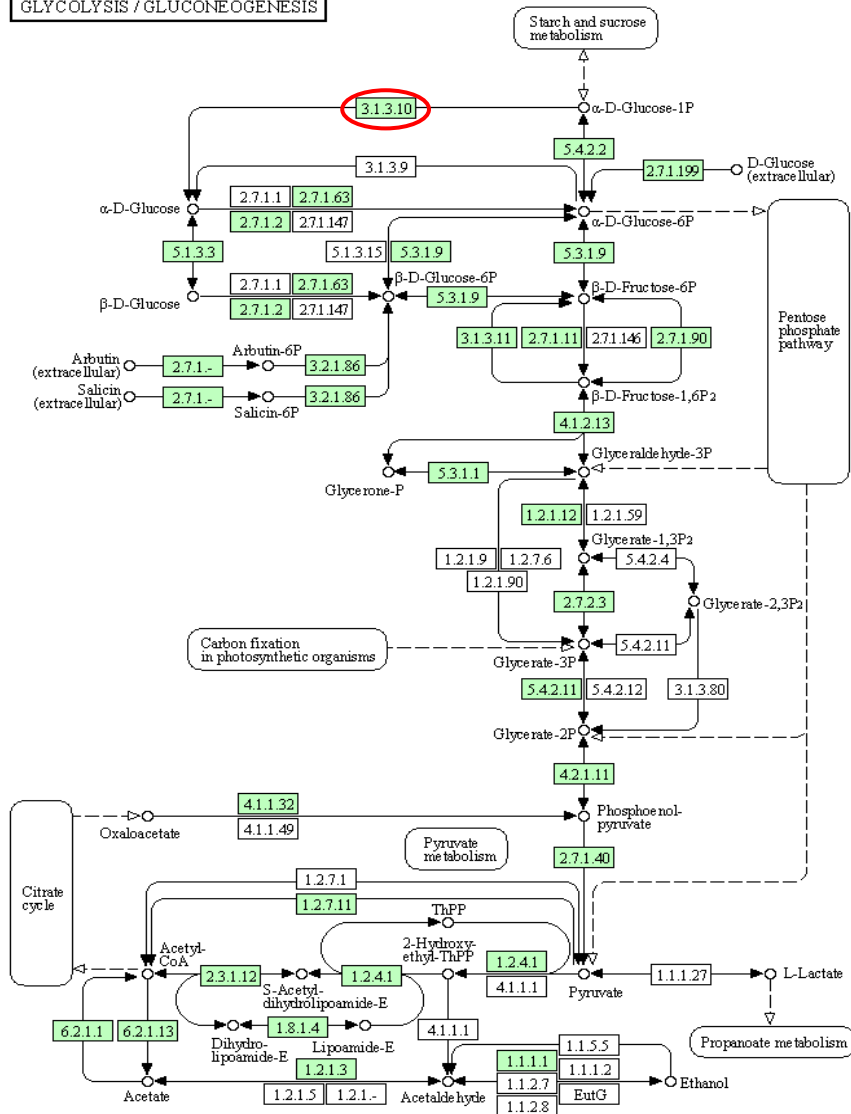

00010 4/12/18  
(c) Kanehisa Laboratories

*Streptomyces antibioticus* DSM 41481

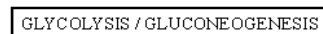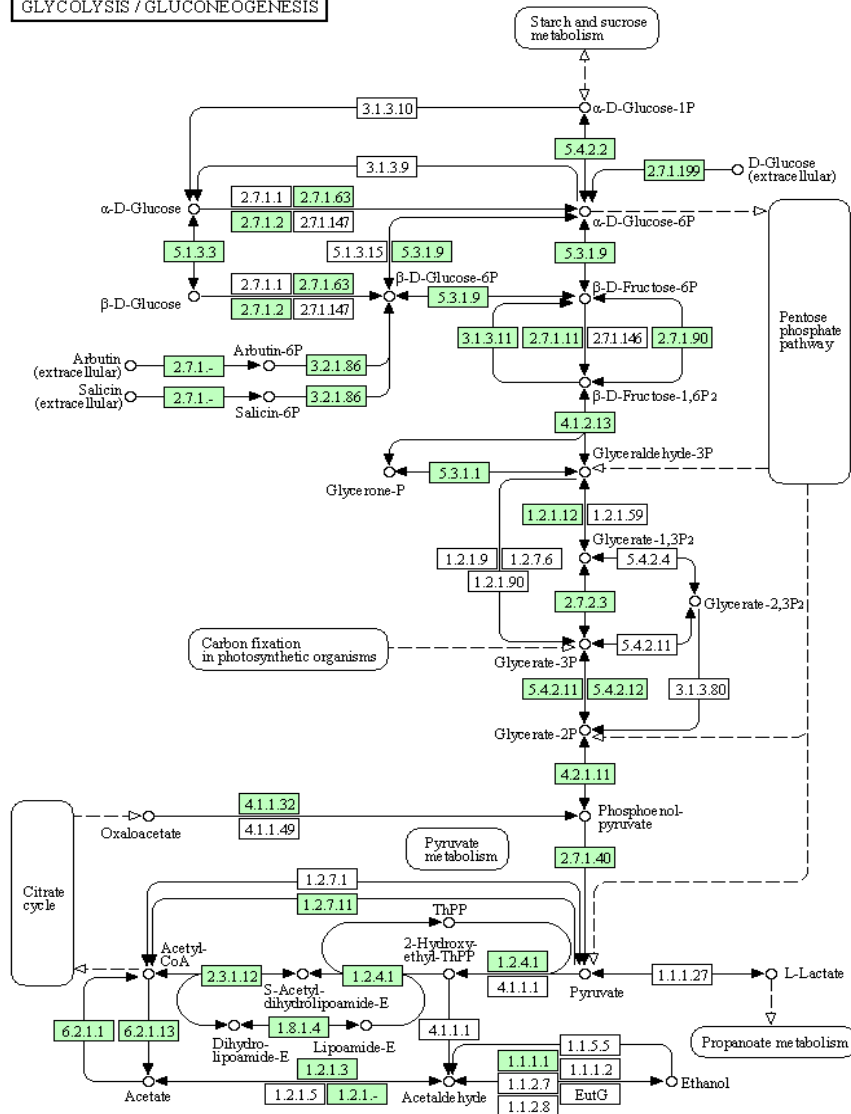

00010 4/12/18  
(c) Kanehisa Laboratories

**Figure S6 :** Comparative analysis of butanoate metabolism of DSM 40868 and DSM 41481.

*Streptomyces* sp. DSM 40868

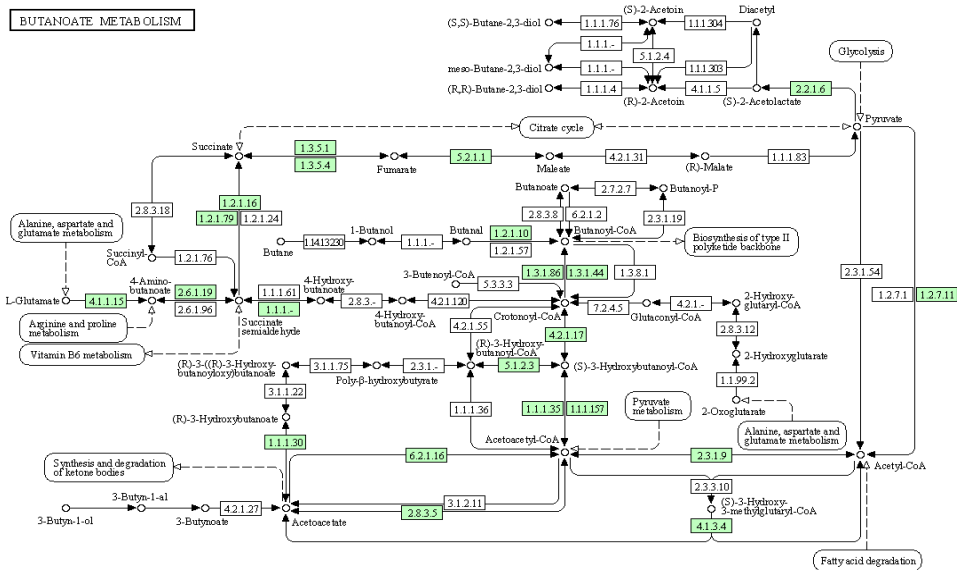

00650 7/29/19  
(c) Kanehisa Laboratories

*Streptomyces antibioticus* DSM 41481

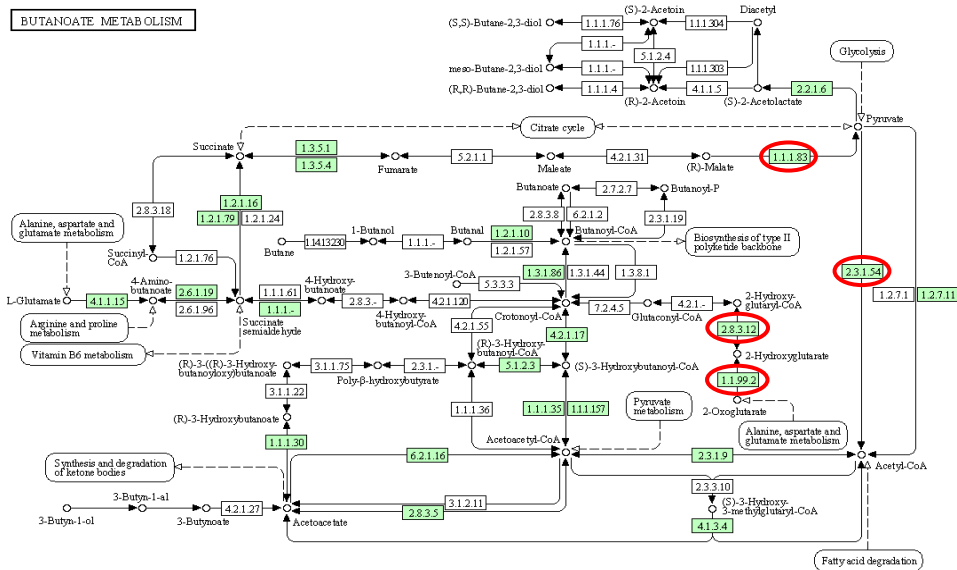

00650 7/29/19  
(c) Kanehisa Laboratories

**Figure S7 :** Comparative analysis of pyruvate metabolism of DSM 40868 and DSM 41481.

*Streptomyces* sp. DSM 40868

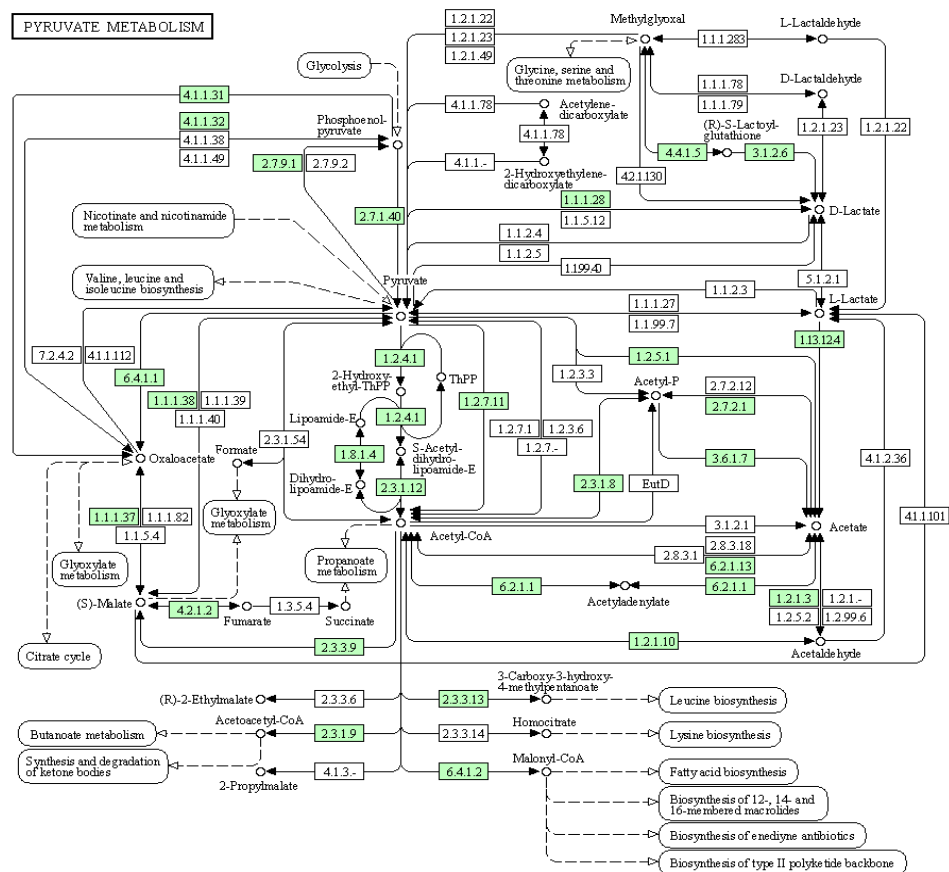

00620 11/21/18  
(c) Kanehisa Laboratories

*Streptomyces antibioticus* DSM 41481

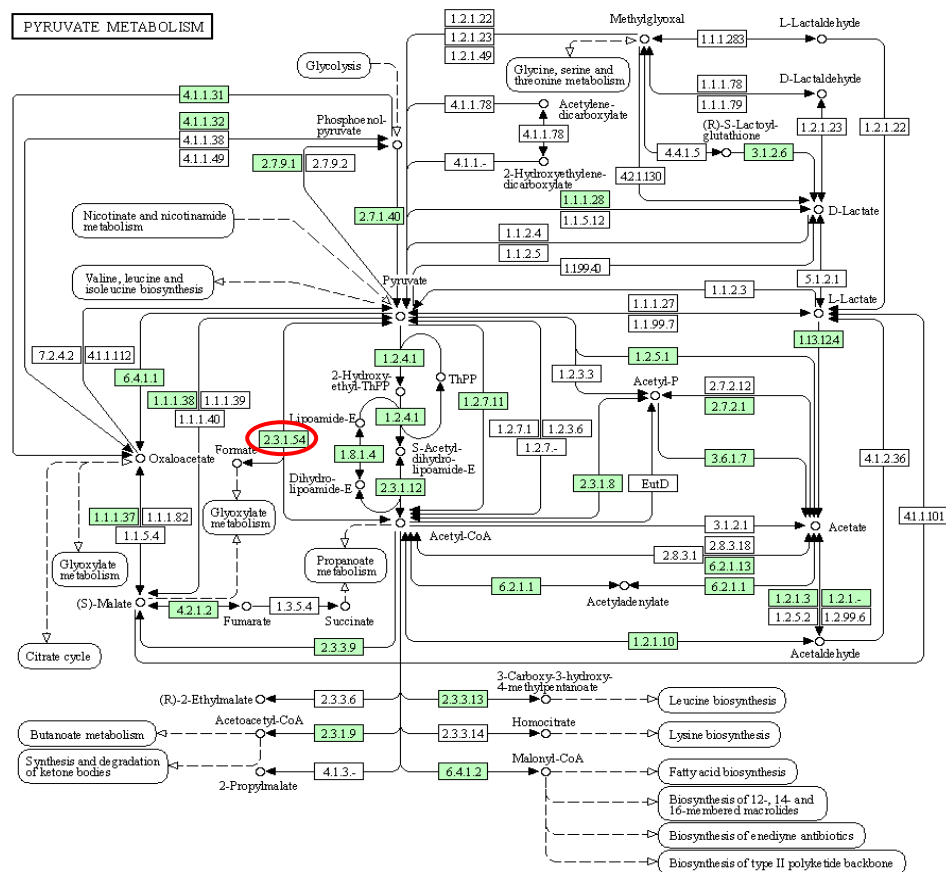

00620 11/21/18  
(c) Kanehisa Laboratories

**Figure S8 :** Comparative analysis of nitrogen metabolism of DSM 40868 and DSM 41481.

*Streptomyces* sp. DSM 40868

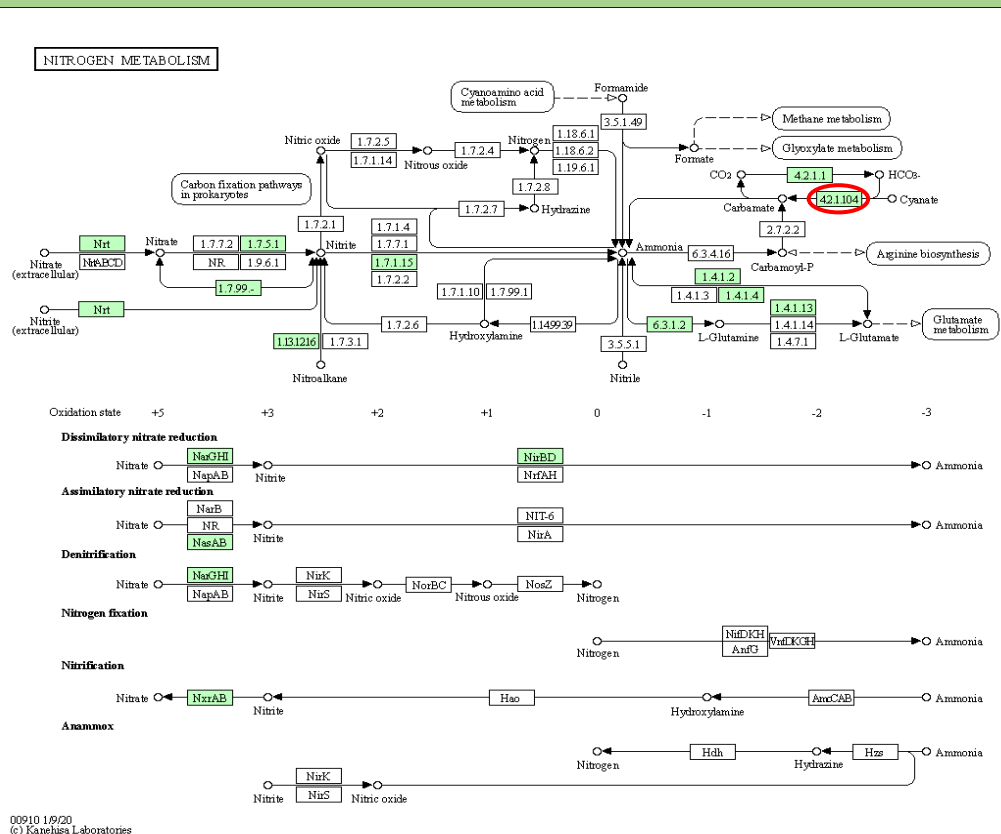

*Streptomyces antibioticus* DSM 41481

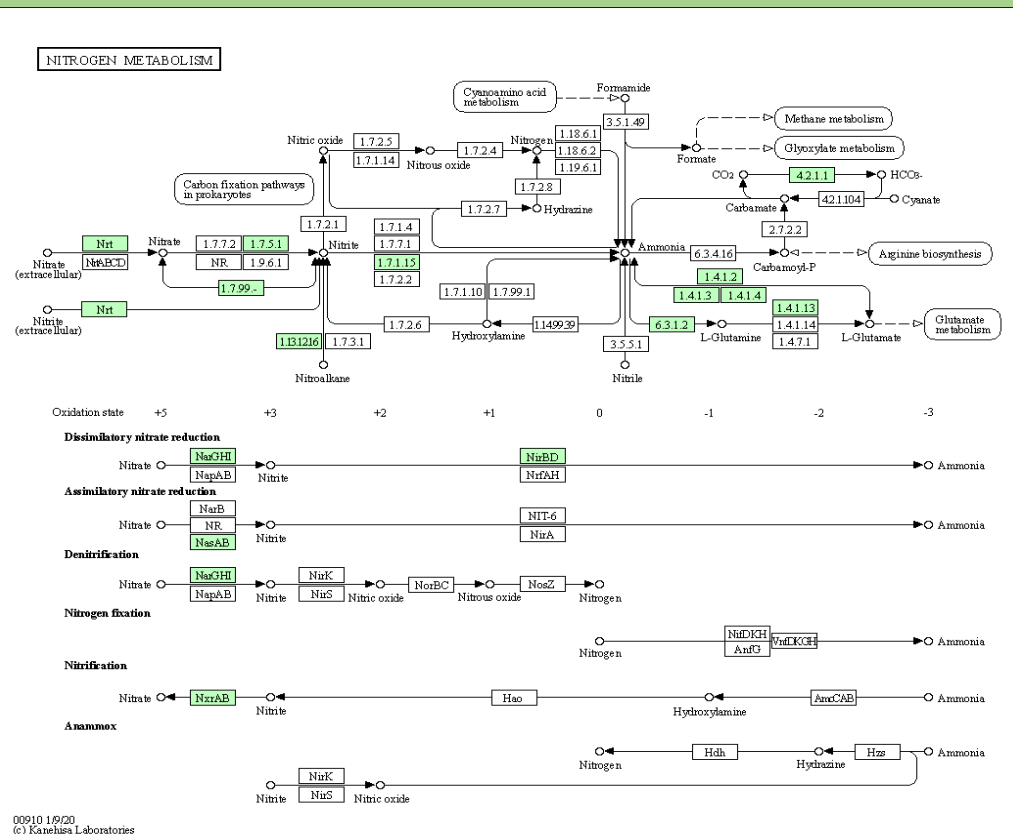



*Streptomyces* sp. DSM 40868

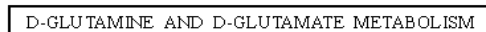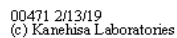

D-GLUTAMINE AND D-GLUTAMATE METABOLISM

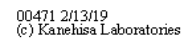

**Figure S10 :** Comparative analysis of pantothenate and CoA biosynthetic pathways of DSM 40868 and DSM 41481.

*Streptomyces* sp. DSM 40868

*Streptomyces antibioticus* DSM 41481

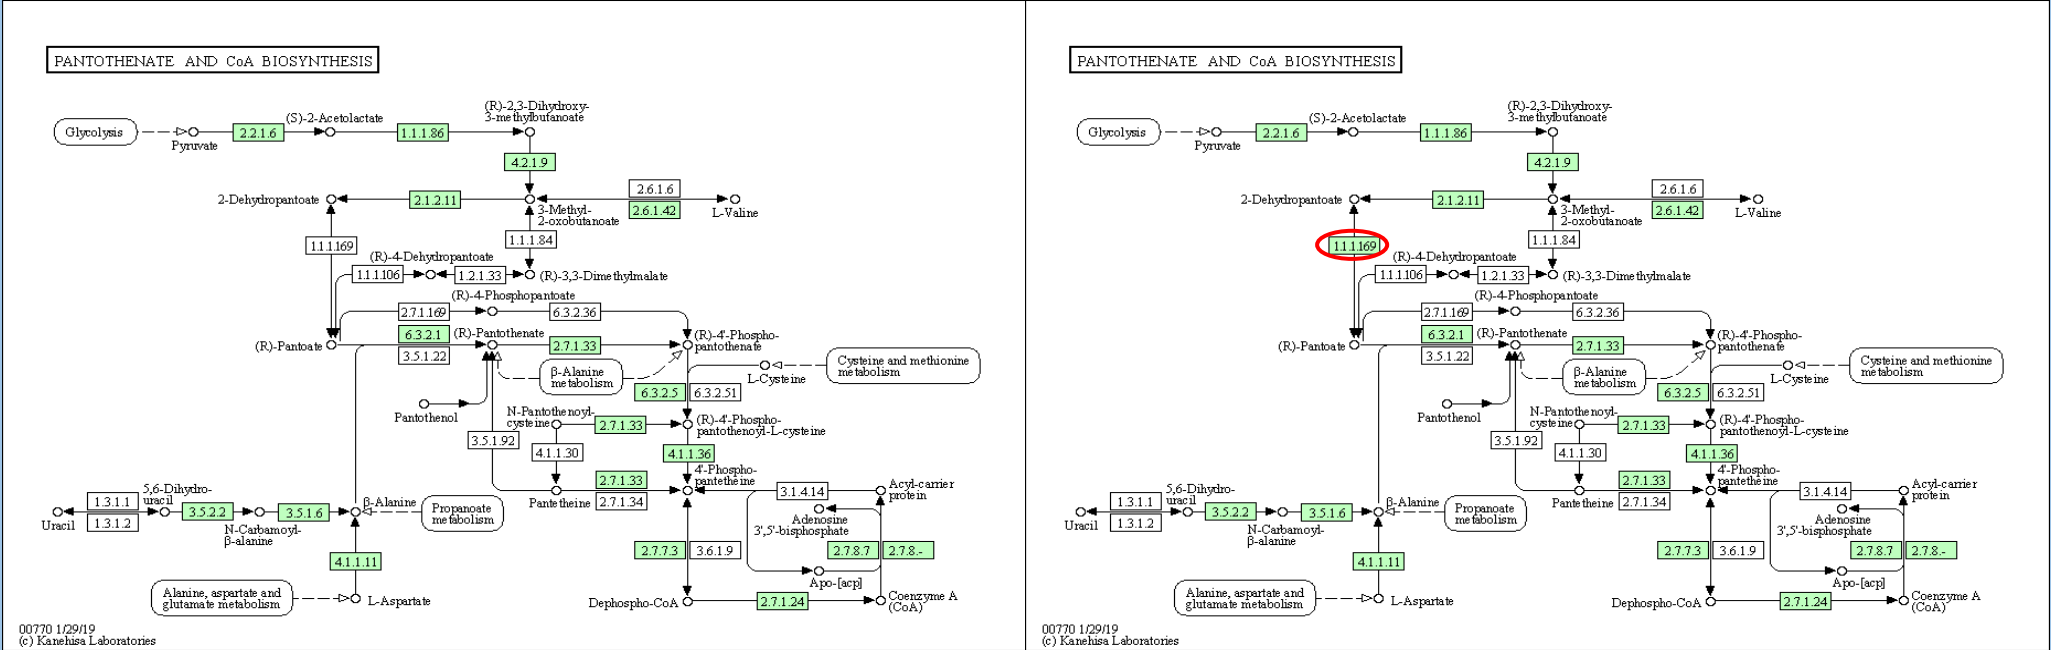

Supplement: s1 [file s1]
