# Supplementary material for: Negative Correlation between Lipid Content and Antibiotic Activity in Streptomyces: General Rule and Exceptions
Source: MDPI journal article supplement (doi:10.3390/antibiotics9060280), 2020-05-26
Supplement: s1 [file s1]

**Table S1:** Quaternary gradient mobile phase composition. A, isooctane:ethyl acetate (99.8:0.2, v/v); B, acetone:ethyl acetate (2:1, v/v) containing 0.15% acetic acid (v/v); C, 2-propanol:water (85:15, v/v) containing 0.043% acetic acid (v/v) and 0.104% triethylamine (v/v); D, ethyl acetate.

| Time (min) | Percent solvent |     |    |    | Flow-rate (mL/min) |
|------------|-----------------|-----|----|----|--------------------|
|            | A               | B   | C  | D  |                    |
| 0          | 100             | 0   | 0  | 0  | 0.8                |
| 1.5        | 100             | 0   | 0  | 0  | 0.8                |
| 1.6        | 97              | 3   | 0  | 0  | 0.8                |
| 9          | 94              | 6   | 0  | 0  | 0.8                |
| 11         | 70              | 30  | 0  | 0  | 0.8                |
| 14         | 45              | 55  | 0  | 0  | 0.8                |
| 15         | 45              | 55  | 0  | 0  | 0.8                |
| 16         | 40              | 55  | 5  | 0  | 0.8                |
| 20         | 35              | 55  | 10 | 0  | 0.8                |
| 20.1       | 33              | 50  | 17 | 0  | 0.8                |
| 25         | 38              | 45  | 17 | 0  | 0.8                |
| 25.1       | 48              | 35  | 17 | 0  | 0.8                |
| 30         | 53              | 30  | 17 | 0  | 0.8                |
| 40         | 40              | 0   | 60 | 0  | 0.8                |
| 40.1       | 0               | 100 | 0  | 0  | 0.8                |
| 42         | 0               | 100 | 0  | 0  | 0.8                |
| 42.1       | 50              | 0   | 0  | 50 | 0.8                |
| 45         | 50              | 0   | 0  | 50 | 0.8                |
| 47         | 100             | 0   | 0  | 0  | 0.8                |
| 53         | 100             | 0   | 0  | 0  | 0.8                |
